# Supplementary material for: Decoding phage resistance by mpr and its role in survivability of Mycobacterium smegmatis
Source: PubMed Central journal article supplement — Nucleic Acids Res. 2022 Jun 17;50(12):6938–52. doi: 10.1093/nar/gkac505 (PMC9262609; doi:10.1093/nar/gkac505), 2022-06-17
Supplement: gkac505_supplemental_file.pdf [file gkac505_supplemental_file.pdf]

Supplementary figures

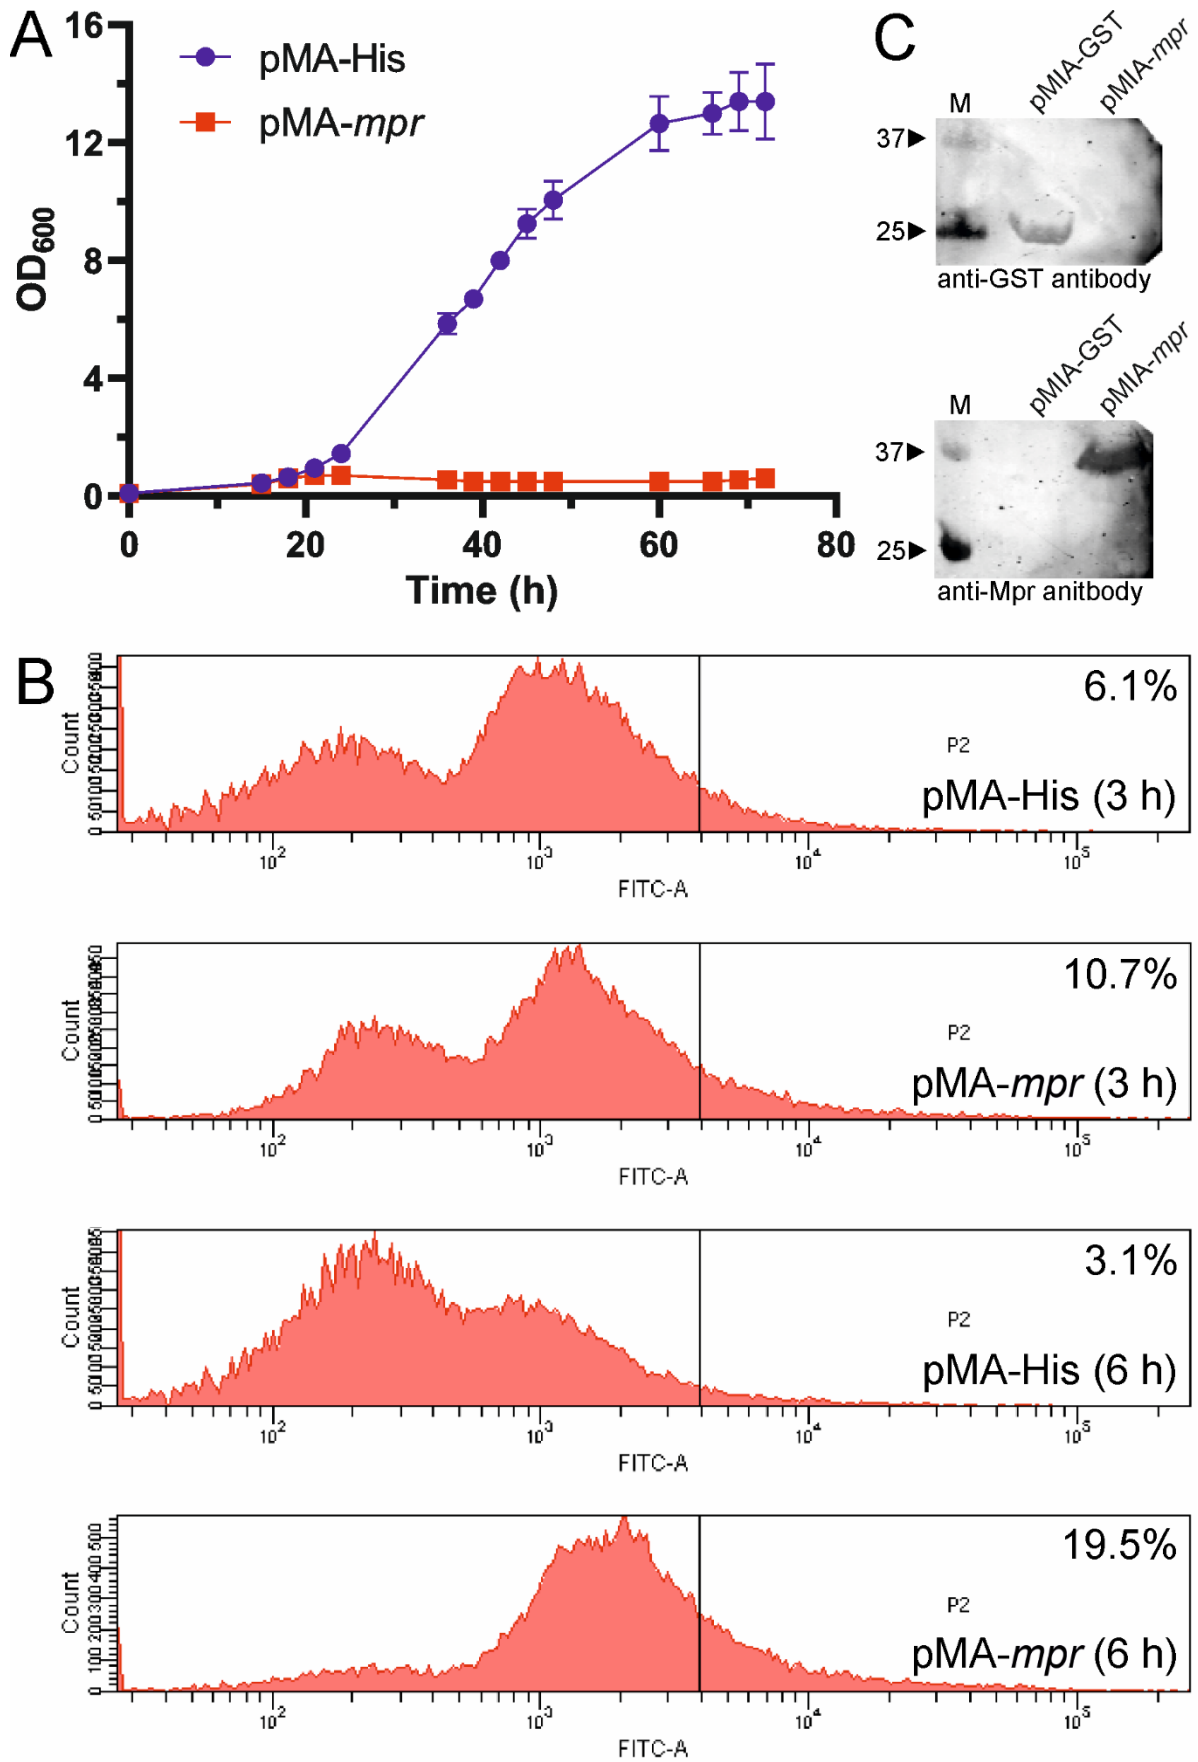

**Figure S1. Toxicity due to *mpr* overexpression.** (A) Growth curve of MsmWT under *mpr* overexpressed condition is shown; empty vector (pMA-His) is used as a control. (B) FACS analysis of MsmWT under *mpr* overexpressed condition at 3 and 6 h of induction after labelling the cells with sytox green; percent value represents the sytox green positive cells. (C) Expression of GST and Mpr from pMIA system is shown by western blotting. Anti-GST and anti-Mpr antibodies are used to detect the expression of respective proteins. Two molecular weight marker bands are marked (in kDa) for reference.

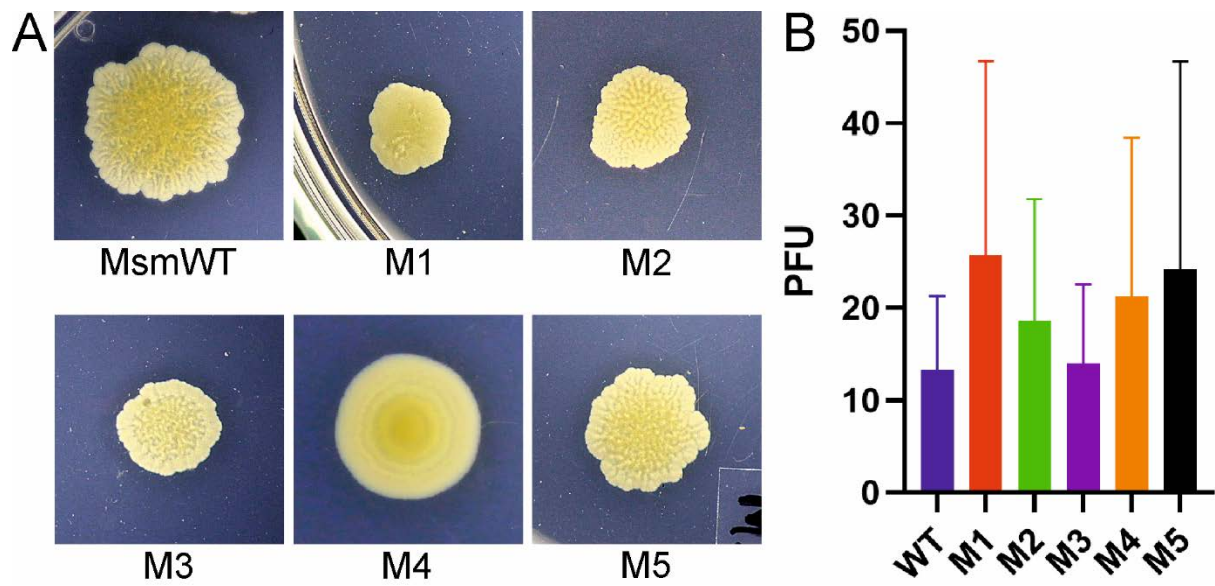

**Figure S2. Colony morphology of mutants.** (A) Panel shows different colony morphology of mutants and the wildtype on MB agar plate. Mutant cultures were grown in a liquid medium followed by serial dilution and plating on MB plates. Single colonies are photographed and shown. (B) Graph showing PFU count representing unabsorbed phages in mutant culture; wildtype (WT) cells are used as control.

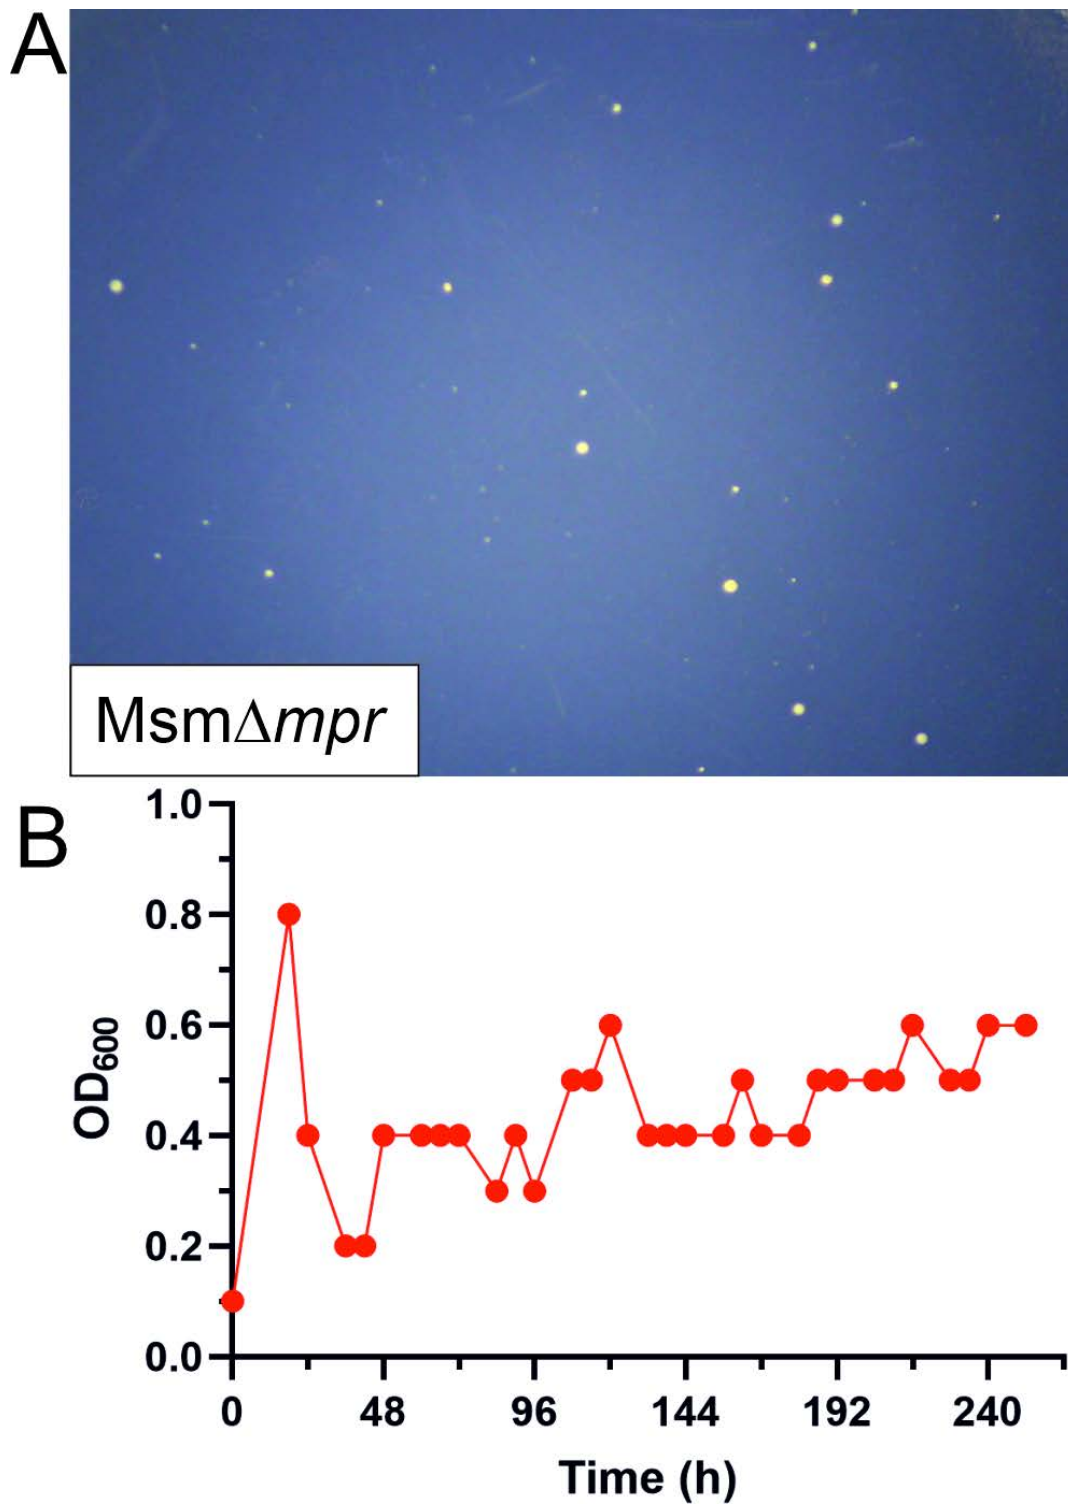

**Figure S3. Weak phage resistance in mutant colonies appeared in knockout culture.** (A) Shown is the agar plate image with mutant/resistant colonies appearing in the absence of *mpr*. Panel B shows a continuous fluctuation in OD<sub>600</sub> in case of mutant colonies rising in the absence of *mpr*. Only one representative graph is shown here.
